# Supplementary material
Source: Royal Society of Chemistry journal article supplement (doi:10.1039/d6dd00134c)
Supplement: d6dd00134c1.pdf [file d6dd00134c1.pdf]

**Supplementary Data for Aqeeli et al. Novelty-Aware Evolutionary Bayesian  
 Optimisation for Multi-Objective Discovery Science**

1  
 2  
 3  
 4

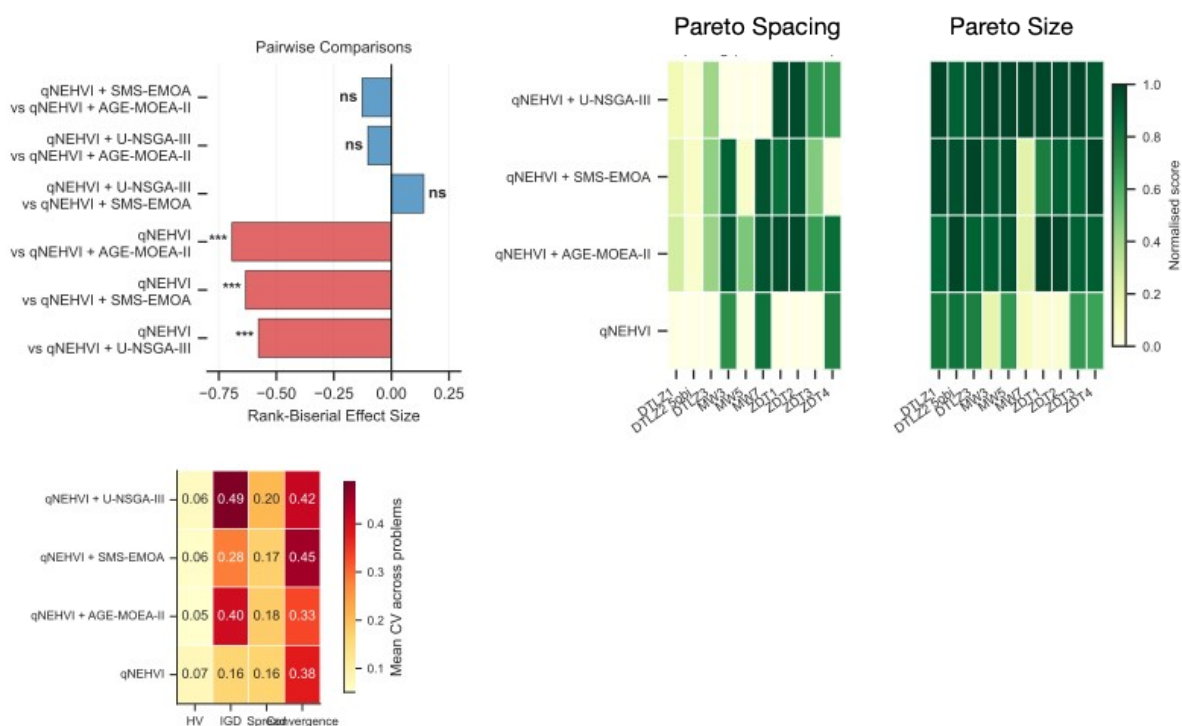

5  
 6  
 7  
 8  
 9  
 10

**Figure S1:** Statistical analysis and Pareto properties for different systems. Pareto spacing is defined as the normalised average spacing between points on the Pareto front. Pareto size is defined as the

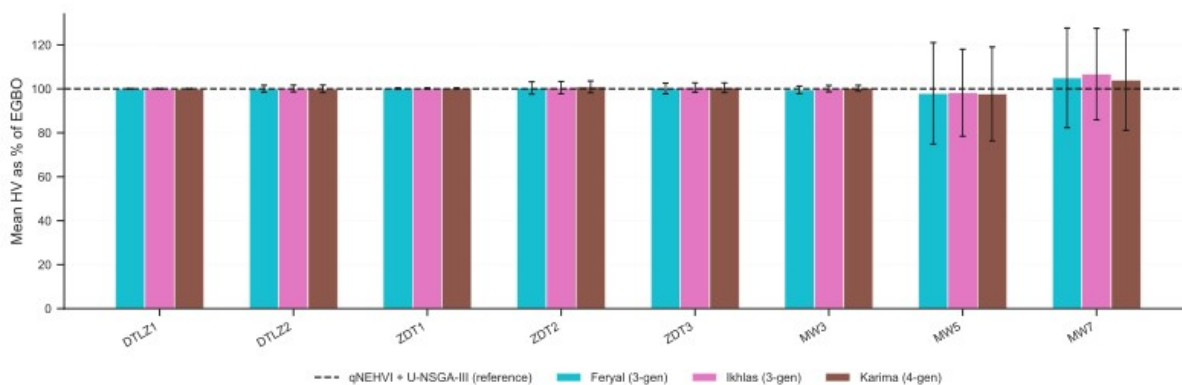

11  
 12  
 13  
 14

**Figure S2:** HV metrics for multi-generator frameworks on all tested problems.

15  
16  
17

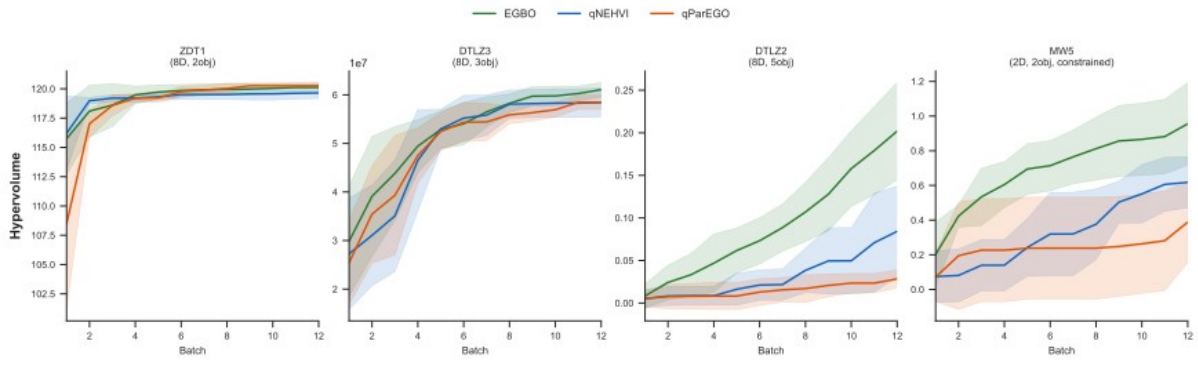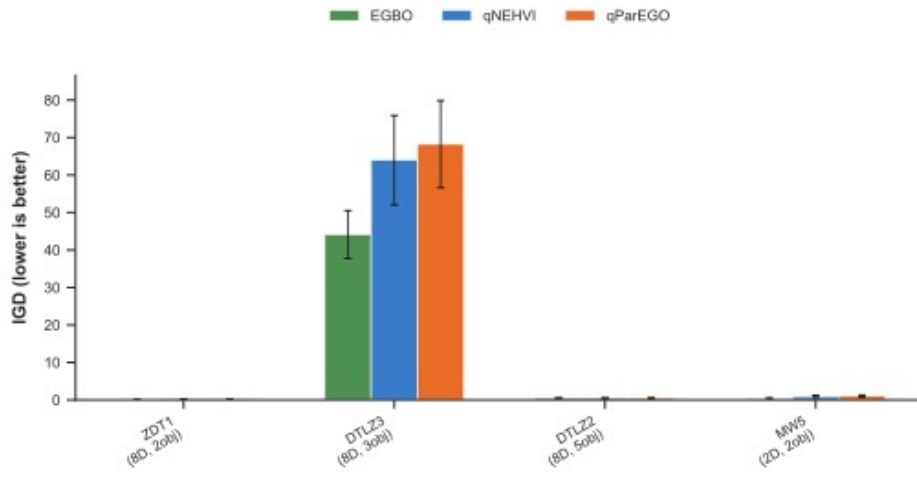

18  
19  
20  
21  
22  
23  
24  
25  
26  
27  
28  
29  
30  
31  
32  
33  
34

**Figure S3.** Comparison of EGBO, ParEGO, and qNEVI on four synthetic test systems showing hypervolume traces (top), and IGD scores (bottom).

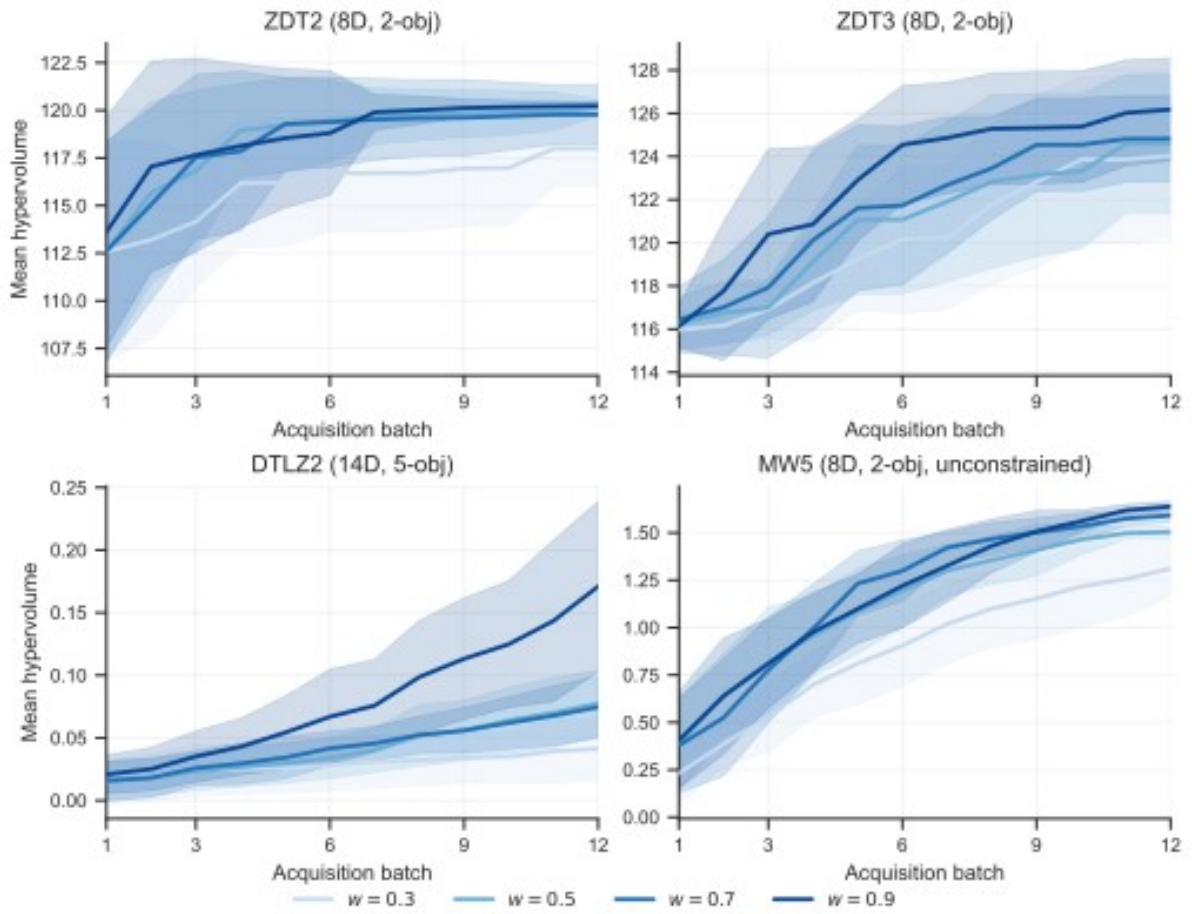

35  
36

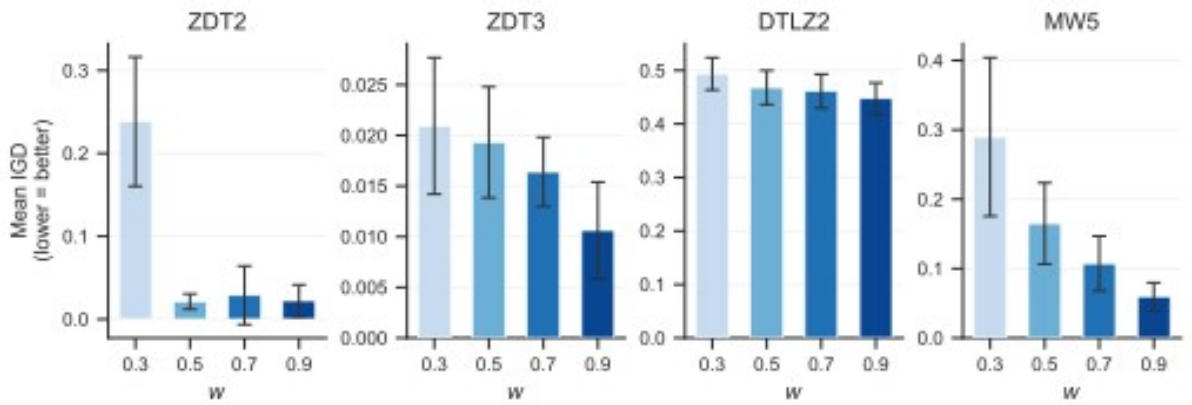

37  
38  
39  
40  
41  
42  
43  
44

**Figure S4:** Sensitivity analysis for weight parameter of novelty-aware EGBO.

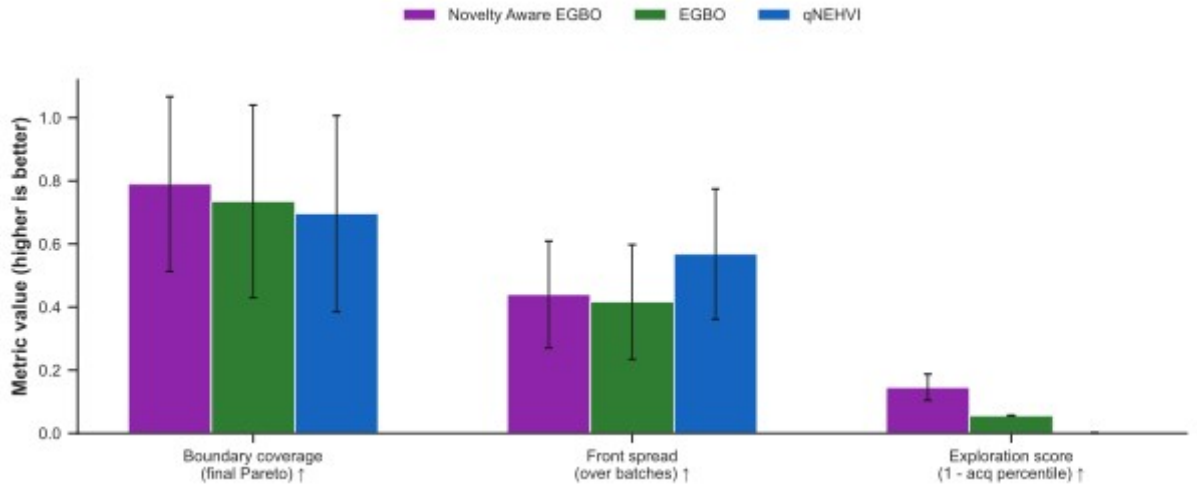

45  
 46 **Figure S5:** Pareto properties for Novelty-aware EGBO, EGBO, and qNEHVI across a range  
 47 of 10 benchmark tests  
 48

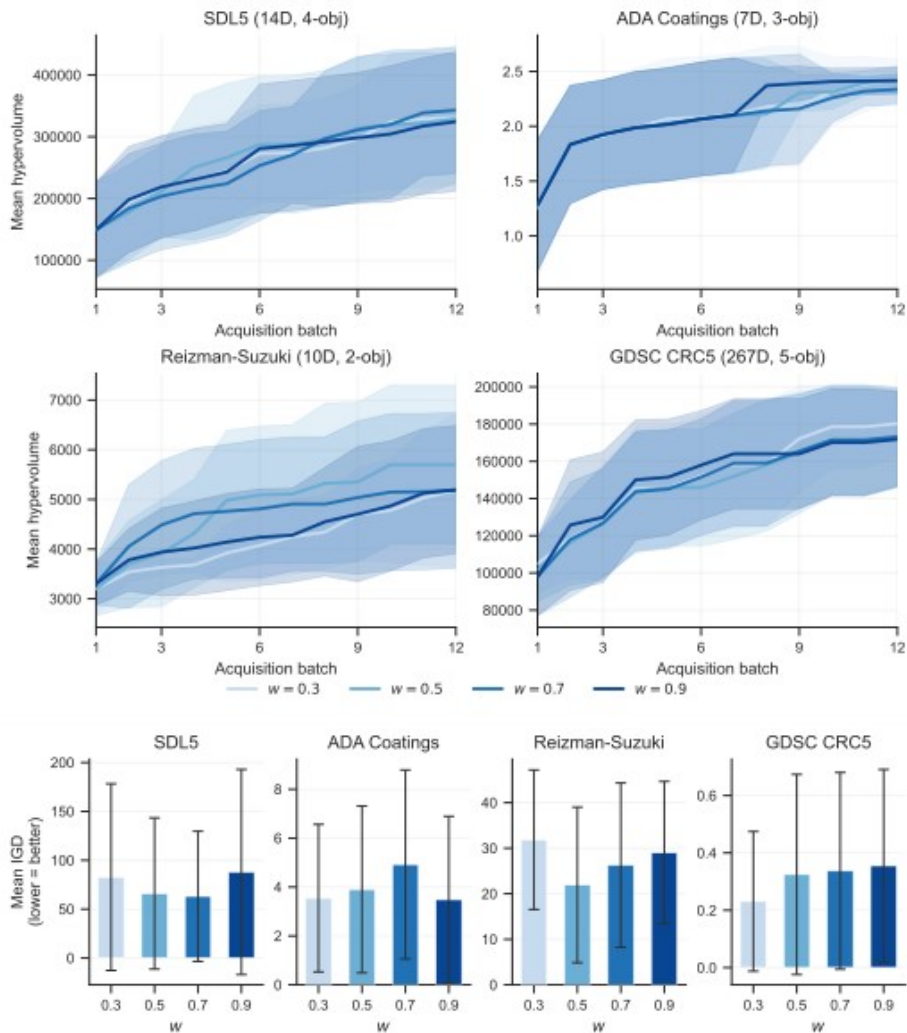

49  
 50 **Figure S6:** Novelty-aware EGBO Weight sensitivity sweep for real world post-hoc datasets  
 51 showing mean hypervolume traces (top) and Mean IGD scores (bottom).  
 52  
 53  
 54

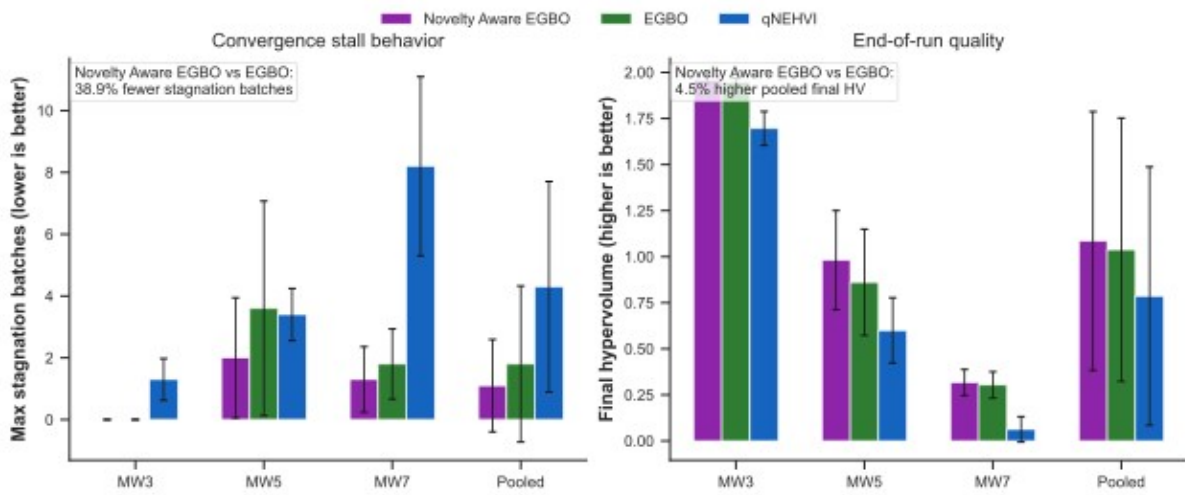

56

57 **Figure S7:** MW problem metrics for Novelty-aware EGBO, EGBO, and qNEHVI.

58

59

60
