# Supplementary material
Source: Royal Society of Chemistry journal article supplement (doi:10.1039/d6dd00134c)
Supplement: d6dd00134c2.pdf [file d6dd00134c2.pdf]

| Purpose                                                                        | Dataset / Problems                                                      | Variable(s) Tested                                                                  | Fixed Settings                                                                                                                            | Candidate budget details (per BO batch)                                                                                | Notes                                                                     |
|--------------------------------------------------------------------------------|-------------------------------------------------------------------------|-------------------------------------------------------------------------------------|-------------------------------------------------------------------------------------------------------------------------------------------|------------------------------------------------------------------------------------------------------------------------|---------------------------------------------------------------------------|
| Compare hybrid EGBO variants using different evolutionary generators           | 10 benchmark problems (ZDT1–4, DTLZ1, DTLZ3, DTLZ2-5obj, MW3, MW5, MW7) | Evolutionary algorithm (U-NSGA-III, SMS-EMOA, AGE-MOEA-II) vs qLogNEHVI baseline    | 18 initial samples; batch size = 8; 12 batches; 10 repeats; shared seeds; GP surrogate (Matérn 5/2); qLogNEHVI acquisition; EA pool = 256 | qLogNEHVI: 8 candidates; single EA generator: 64 candidates; merged pool: 72; selected/evaluated: 8                    | Core benchmarking experiment                                              |
| Assess whether combining multiple evolutionary generators improves performance | Subset of 8 benchmark problems                                          | Generator combinations (U-NSGA-III + SMS-EMOA, AGE-MOEA-II + U-NSGA-III, all three) | Same as Study 1; equal total EA sample contribution per batch                                                                             | 2-generator hybrid: (8 + 64 + 64 = 136) pool; 3-generator hybrid: (8 + 64 + 64 + 64 = 200) pool; selected/evaluated: 8 | Tests diminishing returns of added complexity                             |
| Evaluate sensitivity of methods to experimental noise                          | ZDT2, ZDT3, DTLZ2 (5 obj), MW5                                          | Gaussian noise level (0%, 1%, 5%, 10%, 20%)                                         | Same as Study 1; EGBO (U-NSGA-III) vs qLogNEHVI                                                                                           | EGBO: 72-pool (8 BO + 64 EA) then select 8; baseline qLogNEHVI: 8 then select 8                                        | Noise scaled relative to objective range                                  |
| Assess feasibility discovery and scalability                                   | MW3, MW5, MW7; MW5 with a range of constraint tightness                 | Constraint difficulty; feature dimensionality                                       | Same as Study 1; EGBO (U-NSGA-III) vs qLogNEHVI                                                                                           | EGBO candidate budget as above; qLogNEHVI baseline uses BO-only candidate set                                          | MW5 constraint boundaries modified; dimensionality increased artificially |
| Assess feasibility discovery and scalability                                   | MW5 high-dimensional variants (50D, 100D)                               | Constraint difficulty; feature dimensionality                                       | Same as Study 1; EGBO (U-NSGA-III) vs qLogNEHVI                                                                                           | EGBO candidate budget as above; qLogNEHVI baseline uses BO-only candidate set                                          | MW5 constraint boundaries modified; dimensionality increased artificially |
| Evaluate performance on experimental datasets                                  | Suzuki; SDL5; ADA coatings; GDSC CRC5                                   | Optimisation strategy (qLogNEHVI, EGBO, Novelty Aware EGBO)                         | 18 initial samples; batch size = 4; 12 batches; 10 repeats; shared seeds; post-hoc selection without replacement                          | qLogNEHVI: 8 candidates; single EA generator: 64 candidates; merged pool: 72; selected/evaluated: 8                    | Post-hoc analysis on existing experimental data                           |

**Table S1:** Details of simulations performed including variables tested and settings fixed.
